# Supplementary material
Source: Royal Society of Chemistry journal article supplement (doi:10.1039/d6cp00351f)
Supplement: d6cp00351f1.pdf [file d6cp00351f1.pdf]

## Supporting Information

# Modeling fission product nucleation in molten NaCl using universal machine-learning potentials

Agustin Salcedo<sup>a</sup>, Giovanni Pireddu<sup>a</sup>, Mathieu Salanne<sup>\*,b,c</sup>, David Lambertin<sup>a</sup>

<sup>a</sup>*NAAREA, 66 allée de Corse, 92000, Nanterre, France*

<sup>b</sup>*Physico-Chimie des Électrolytes et Nanosystèmes Interfaciaux, PHENIX, Sorbonne Université, CNRS, F-75005  
Paris, France*

<sup>c</sup>*CNRS@CREATE, Singapore 138601, Singapore*

*\*mathieu.salanne@sorbonne-universite.fr*

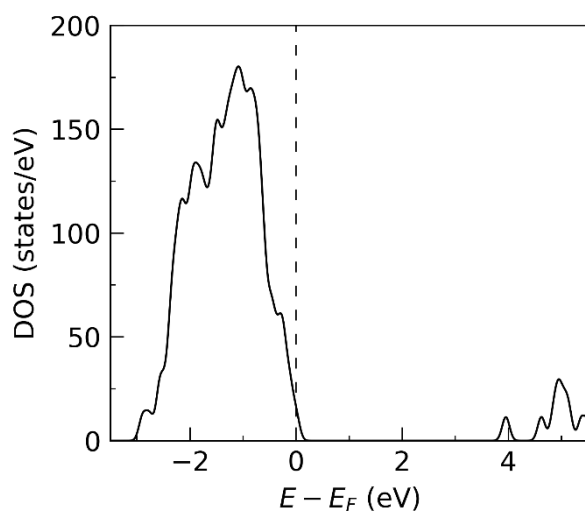

**Figure S1.** DFT-calculated density of states (DOS) of pure NaCl after 5 ps of equilibration. Gaussian broadening = 0.07 eV.

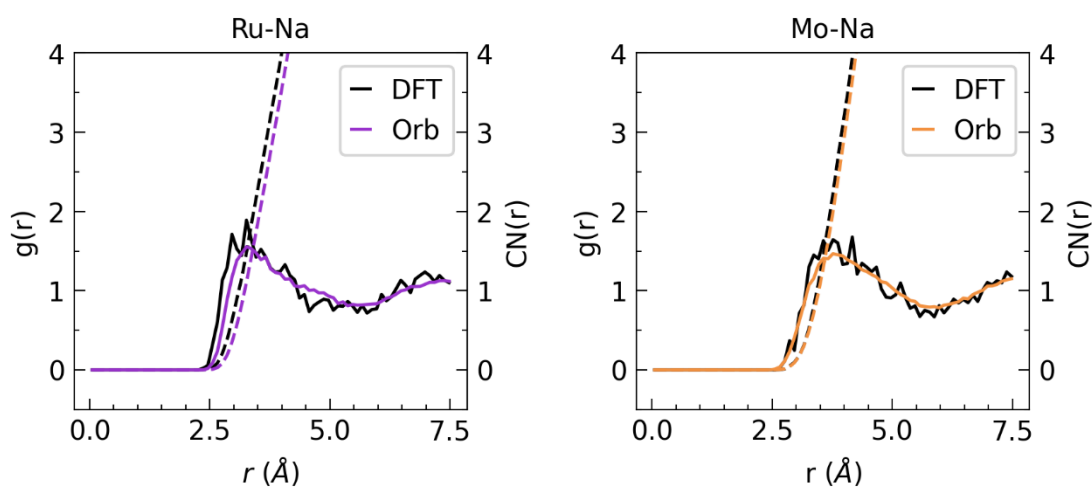

**Figure S2.** Partial radial distribution functions  $g(r)$  (solid lines), and coordination numbers  $CN(r)$  (dashed lines), for the Ru-Na and Mo-Na correlations. Results from DFT are represented with black lines. Orb results are indicated in purple (Ru) or orange (Mo).

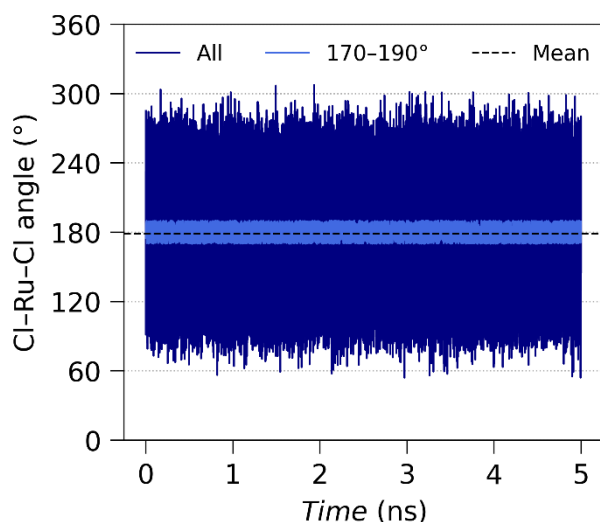

**Figure S3.** Time evolution of the Cl–Ru–Cl angle computed with the Orb model over a 5 ns MD trajectory. The distinction between acute ( $<180^\circ$ ) and obtuse ( $>180^\circ$ ) angles is defined using an arbitrary sign convention, chosen such that a reference configuration corresponds to an acute angle. Although a wide variety of coordination numbers and corresponding angles is sampled during the trajectory (minimum of  $52.6^\circ$  /  $307.4^\circ$ ), configurations with angles close to  $180^\circ$  are observed across the entire trajectory, and the average angle is  $178^\circ$ , consistent with the predominance of twofold-coordinated Ru species.

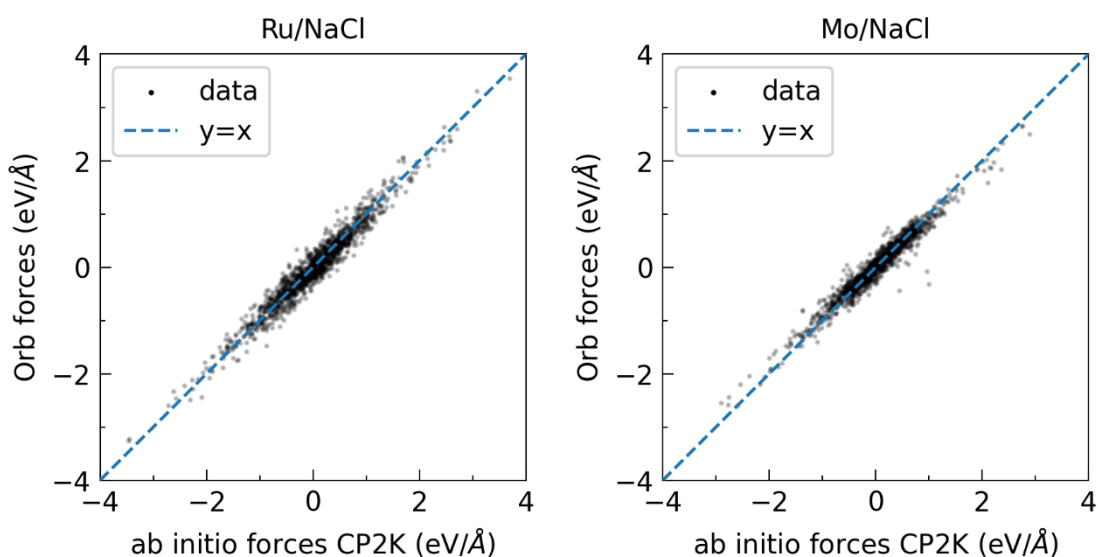

**Figure S4.** Parity plots illustrating the correlation between the forces calculated using Orb ( $y$ -axis) and DFT ( $x$ -axis) for the same molecular configurations. Left panel: total forces on Ru; right panel: total forces on Mo.

**Table S1.** Summary of literature-reported ground-state bond lengths, binding energies, and magnetic moments of Ru<sub>2</sub> and Mo<sub>2</sub> dimers, compared with the values obtained in this work.

| Method                    | Bond length (Å) | Binding energy (eV) | Magnetization (μB) | Reference |
|---------------------------|-----------------|---------------------|--------------------|-----------|
| Ru                        |                 |                     |                    |           |
| CASTP2                    | 2.10            | -3.93               | 4                  | [1]       |
| BLYP                      | 2.10            | -3.64               | 4                  | [1]       |
| B3LYP                     | 2.23            | -2.22               | 6                  | [1]       |
| r <sup>2</sup> SCAN       | 2.22            | -3.00               | 6                  | This work |
| PBE                       | 2.09            | -3.67               | 4                  | This work |
| Orb v3                    | 2.10            | -2.76               | -                  | This work |
| Mo                        |                 |                     |                    |           |
| MS-CASTP2                 | 1.95            | -4.41               | 0                  | [2]       |
| CCSD(T)                   | 1.93            | -3.94               | 0                  | [3]       |
| Photolysis (experimental) | 1.93            | -4.10               | -                  | [4]       |
| r <sup>2</sup> SCAN       | 2.06            | -2.16               | 0                  | This work |
| PBE                       | 1.94            | -3.36               | 0                  | This work |
| Orb v3                    | 1.91            | -3.45               | -                  | This work |

**Table S2.** Comparison of Orb-calculated cohesive energies and lattice parameters with experimental values from the literature.

| Metal | Orb                   |         |         | Experimental          |            |            |
|-------|-----------------------|---------|---------|-----------------------|------------|------------|
|       | $E_{\text{coh}}$ (eV) | $a$ (Å) | $c$ (Å) | $E_{\text{coh}}$ (eV) | $a$ (Å)    | $c$ (Å)    |
| Mo    | 6.20                  | 3.1610  |         | 6.80 [5]              | 3.1471 [6] |            |
| Ru    | 6.26                  | 2.7203  | 4.2903  | 6.74 [5]              | 2.7058 [6] | 4.2816 [6] |

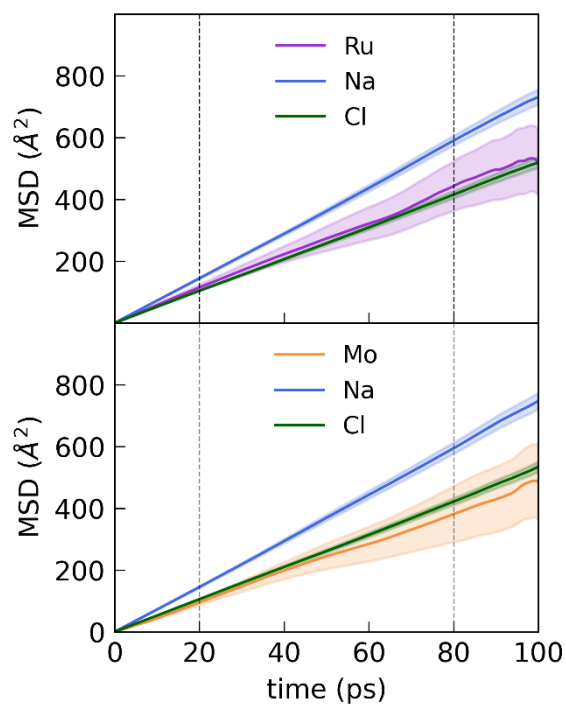

**Figure S5.** Mean square displacement (MSD) as a function of time for Ru (top) and Mo (bottom) atoms in molten NaCl at 900 °C, computed from 5ns NVT MD simulations by block averaging (with blocks of 100 ps), using the Orb model. Solid lines represent the block-averaged MSD, while shaded areas indicate the associated 95% confidence interval. Dashed vertical lines delimit the time window used for linear regression in the Einstein relation to extract diffusion coefficients.

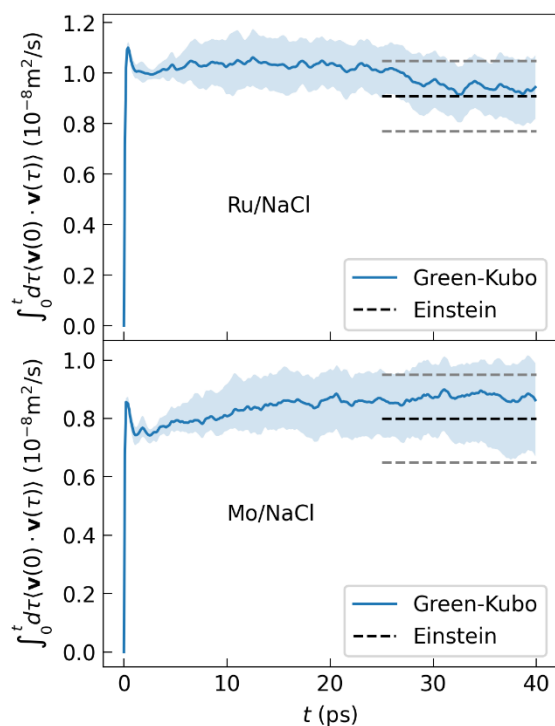

**Figure S6.** Green-Kubo approach for the diffusion coefficient calculation of metallics in NaCl: cumulative integrals of the velocity autocorrelation function (blue lines) as a function of time for Ru (upper panel) and Mo (lower panel). The uncertainty (shaded areas) is calculated as the 95% confidence interval by splitting the original trajectory into ten blocks. The Green-Kubo approach is compared with the results from the Einstein mean square displacement analysis (mean values represented with dashed black lines, mean  $\pm$  uncertainty in grey).

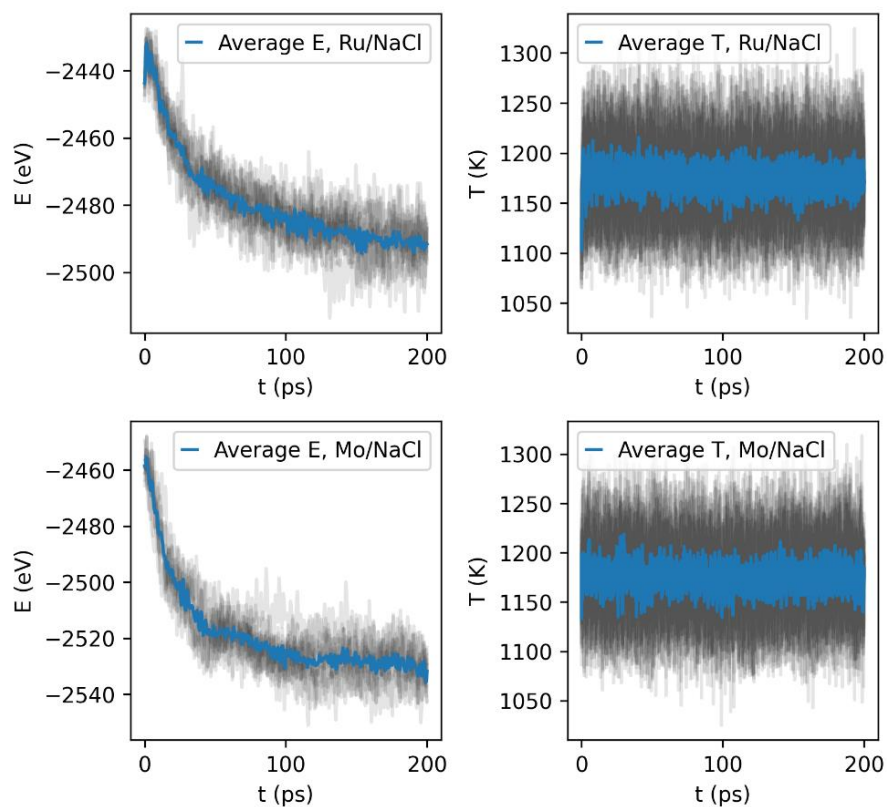

**Figure S7.** Energy and temperature dynamics in nucleation simulations. Energy (left column) and temperature (right column) are reported as a function of simulation time for Ru/NaCl (upper row) and Mo/NaCl (lower row). Results for each replica are indicated in grey, while the average over replicas is represented in blue.

## References

- [1] J. Kim, J. Kim, Density functional and multireference ab initio study of the ground and excited states of Ru<sub>2</sub>, *Chemical Physics Letters* 592 (2014) 24–29. <https://doi.org/10.1016/j.cplett.2013.12.002>.
- [2] A.C. Borin, J.P. Gobbo, B.O. Roos, A theoretical study of the binding and electronic spectrum of the Mo<sub>2</sub> molecule, *Chemical Physics* 343 (2008) 210–216. <https://doi.org/10.1016/j.chemphys.2007.05.028>.
- [3] A.H. Kulahlioglu, L. Mitas, A quantum Monte Carlo study of the molybdenum dimer (Mo<sub>2</sub>), *Computational and Theoretical Chemistry* 1170 (2019) 112642. <https://doi.org/10.1016/j.comptc.2019.112642>.
- [4] Yu.M. Efremov, A.N. Samoilova, V.B. Kozhukhovskiy, L.V. Gurvich, On the electronic spectrum of the Mo<sub>2</sub> molecule observed after flash photolysis of Mo(CO)<sub>6</sub>, *Journal of Molecular Spectroscopy* 73 (1978) 430–440. [https://doi.org/10.1016/0022-2852\(78\)90109-1](https://doi.org/10.1016/0022-2852(78)90109-1).
- [5] D.A. Young, *Phase Diagrams of the Elements*, Reprint 2020, University of California Press, Berkeley, CA, 2020. <https://doi.org/10.1525/9780520911482>.
- [6] J.W. Arblaster, *Selected values of the crystallographic properties of elements*, A S M International, Materials Park, 2018.
